# Supplementary material for: In vivo evaluations of Lactobacillus-fermented Eucheuma spinosum polysaccharides on alleviating food allergy activity
Source: Royal Society of Chemistry journal article supplement (doi:10.1039/d4fo00991f), 2024-01-01

1 **Figure supplements**

2 **Figure S1. Effects of F1-ESP-3 on the population of spleen cells in OVA-induced**  
3 **allergic mice.** Flow cytometry clustering results (A)(C) and statistical analysis (B)(D)  
4 of Th cells and B cells.

5

6 **Figure S2. Pairwise comparison ANOSIM similarity analysis.** (A)Group of NC with  
7 PC; (B)Group of PC with SC; (C)Group of PC with 50 mg/kg; (D)Group of PC with  
8 100 mg/kg; (E)Group of PC with 200 mg/kg.

9

10 **Figure S3. KEGG functional clustering of mouse intestinal flora between NC and**  
11 **PC.**

12 **Figure S1.**

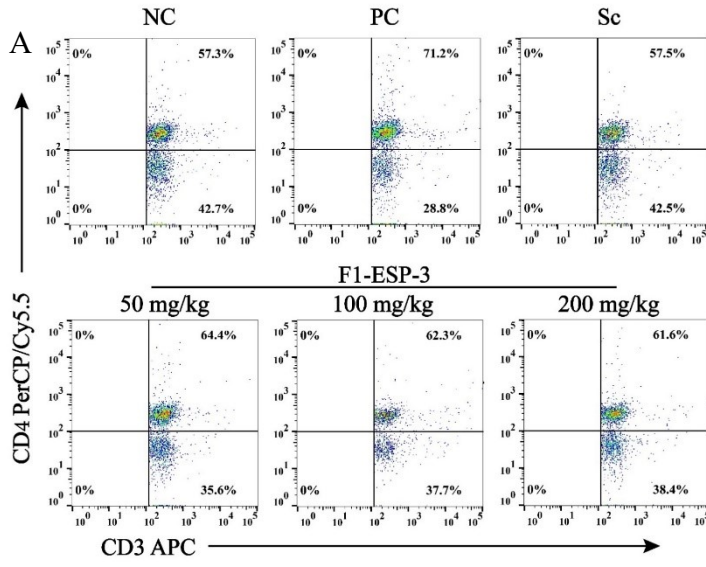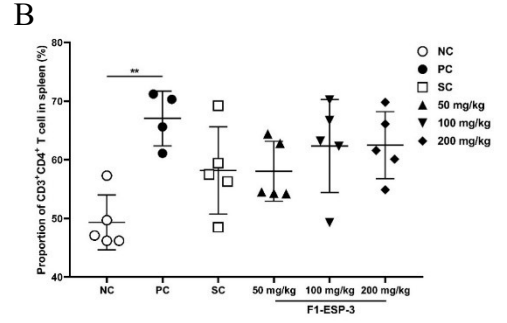

13

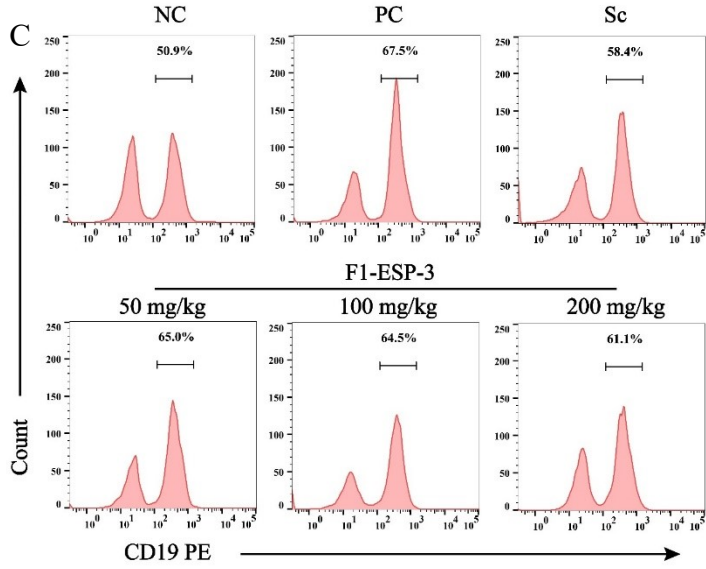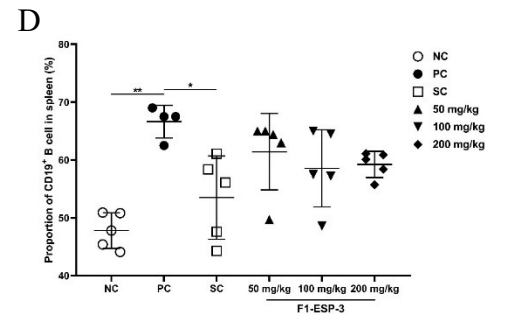

14

15

16 **Figure S2.**

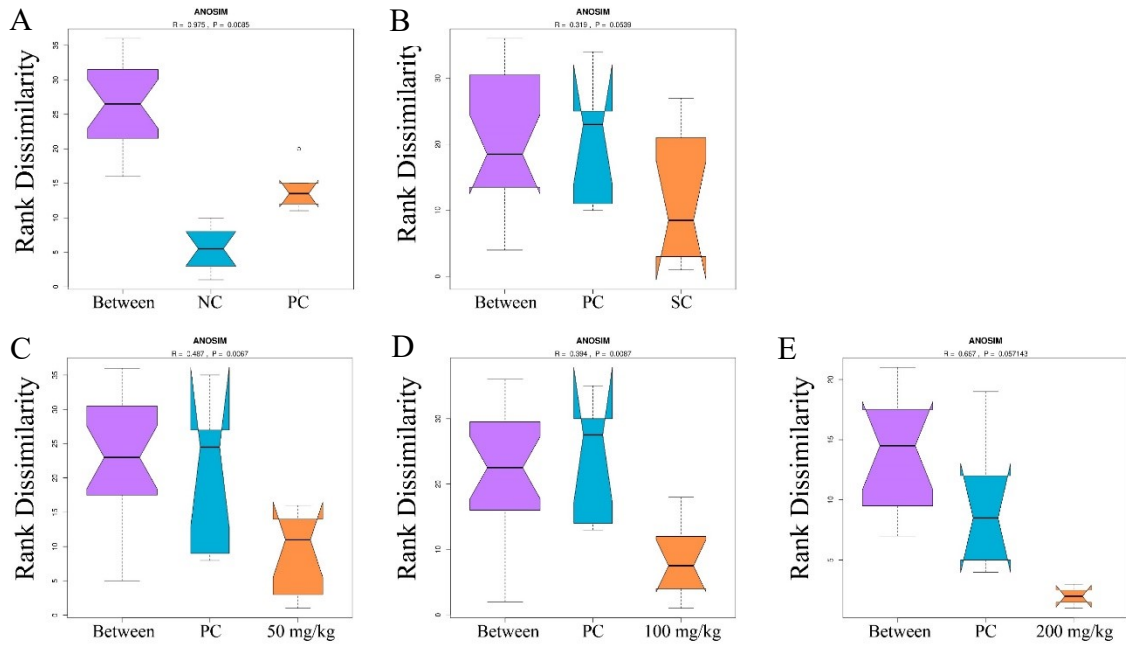

17

18

19 Figure S3.

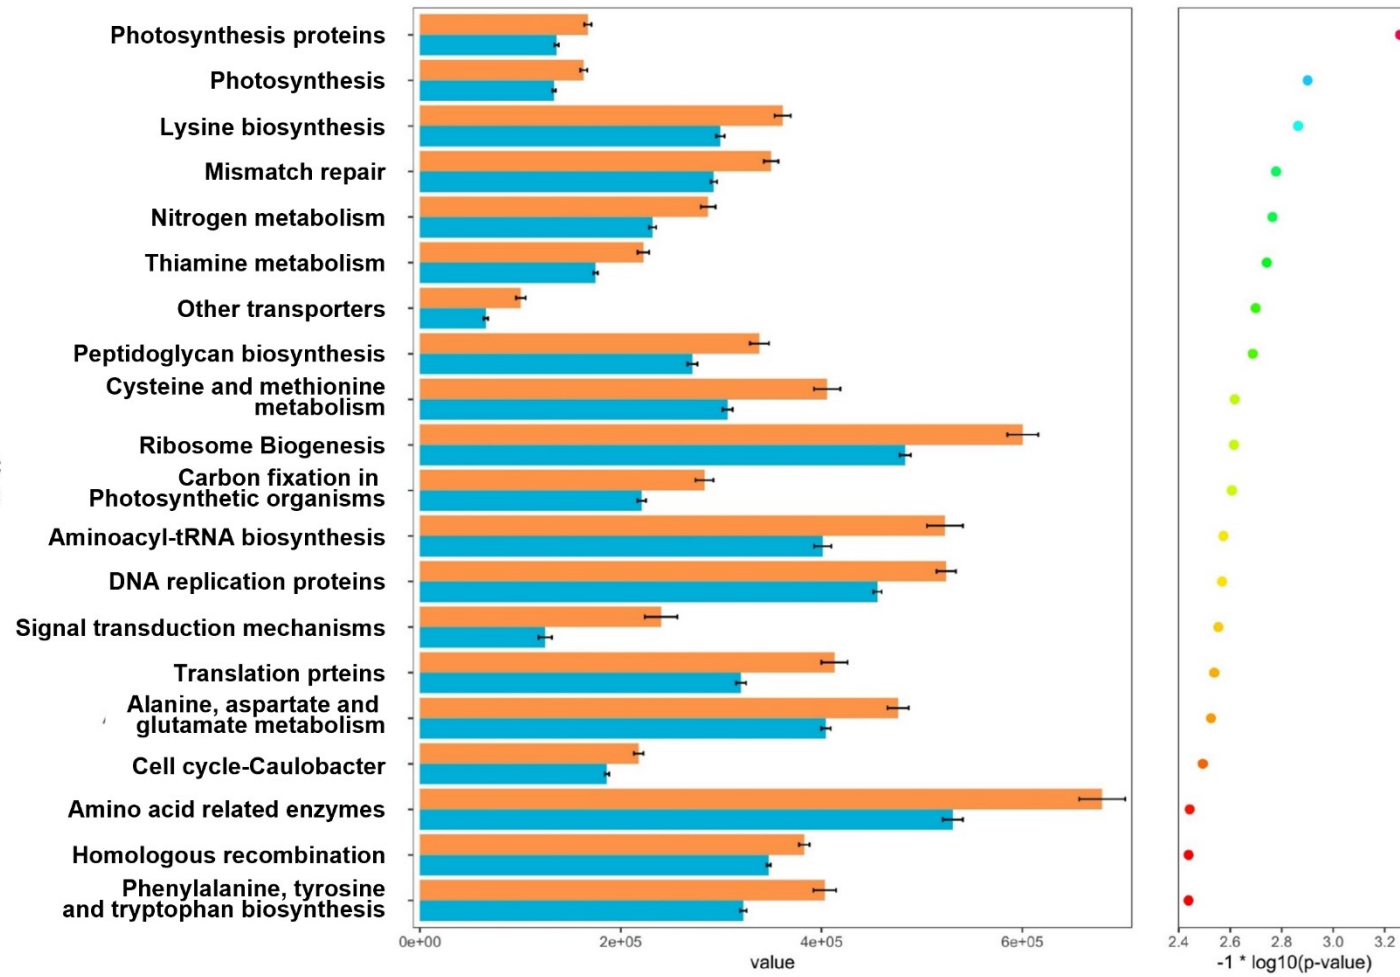

Supplement: d4fo00991f1.pdf [file d4fo00991f1.pdf]
